# Supplementary material
Source: JCI journal article supplement (doi:10.1172/jci194068)

# Full unedited gel for Figure 1N.

**ALP ~75kDa**

WT *Mettl5* KO

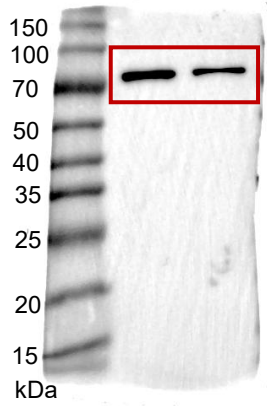

**SP7 ~47-49kDa**

WT *Mettl5* KO

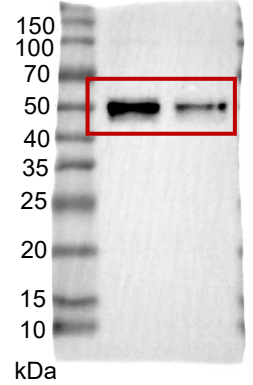

**OPN 55kDa**

WT *Mettl5* KO

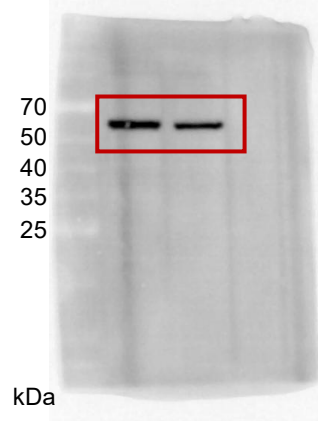

**$\alpha$ -TUBULIN 55kDa**

WT *Mettl5* KO

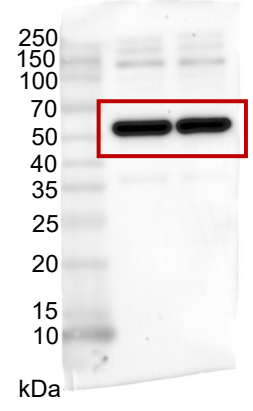

# Full unedited gel for Figure 3F.

**OSER1 32kd**

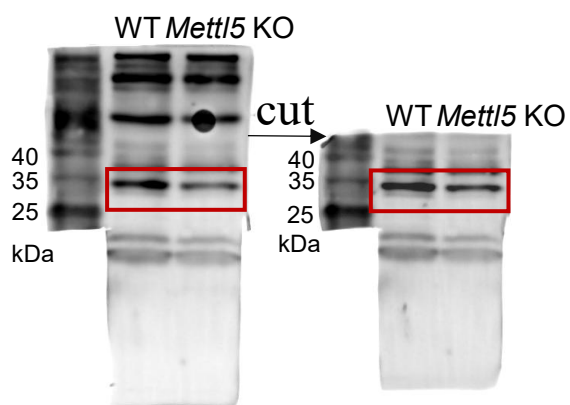

**$\alpha$ -TUBULIN 55kd**

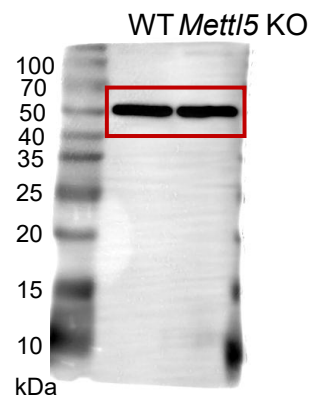

# Full unedited gel for Figure 4J.

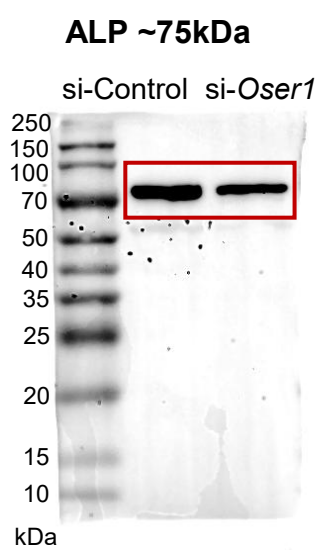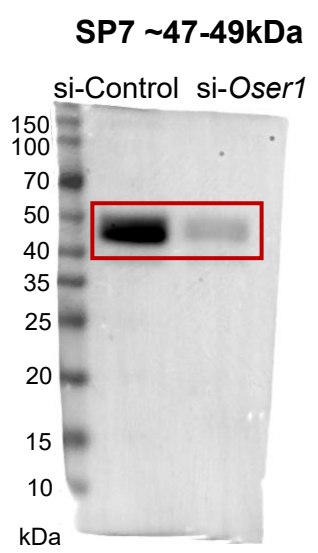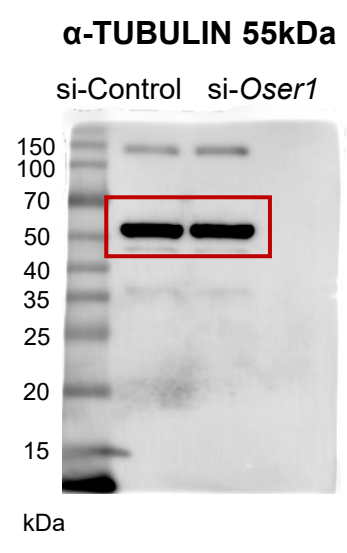

# Full unedited gel for Figure 4K.

## FLAG

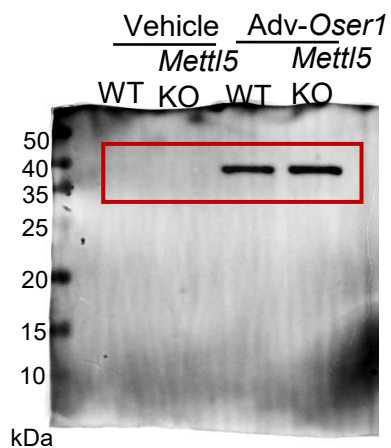

## $\alpha$ -TUBULIN 55kd

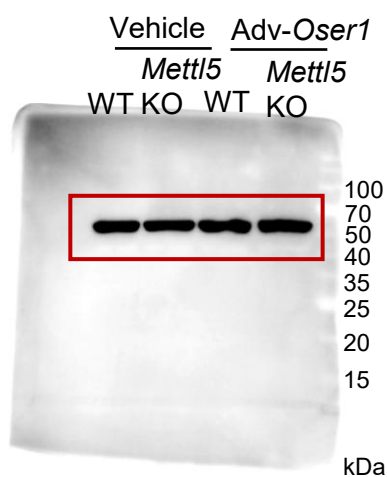

## OSER1 32kd

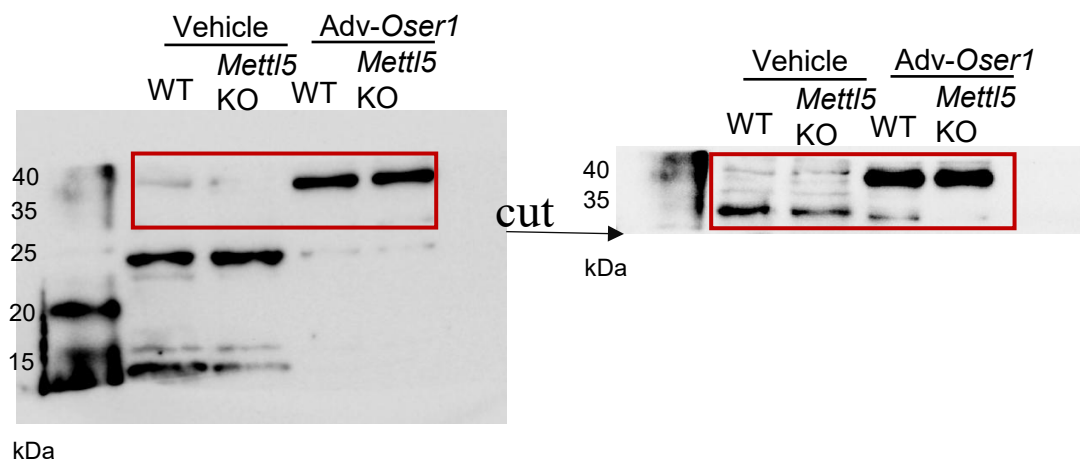

# Full unedited gel for Figure 5C.

## CAT 60kDa

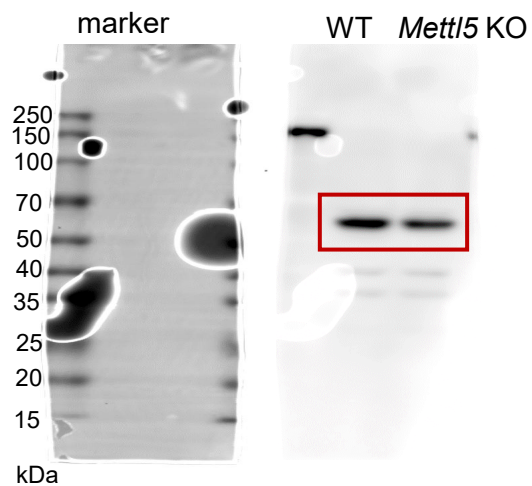

## GSS 52kDa

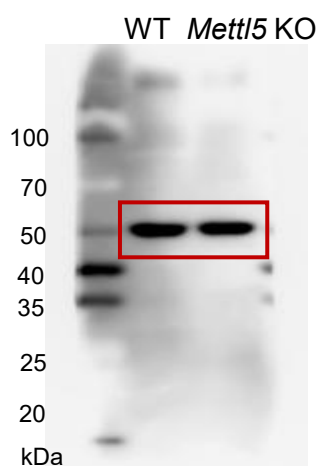

## GPX4 17kDa

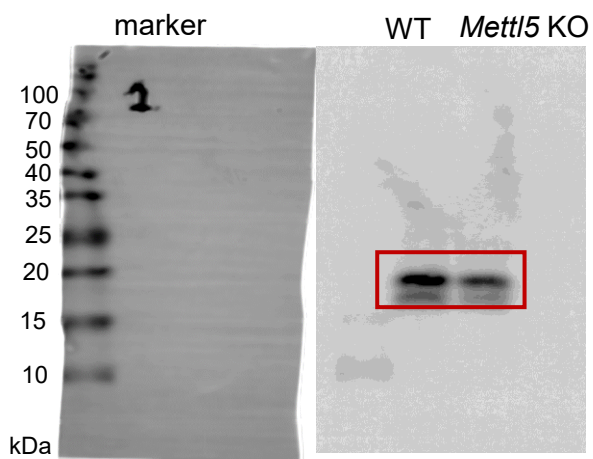

## GSTP1 23kDa

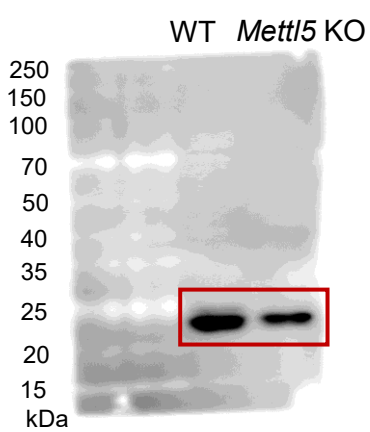

## $\alpha$ -TUBULIN 55kDa

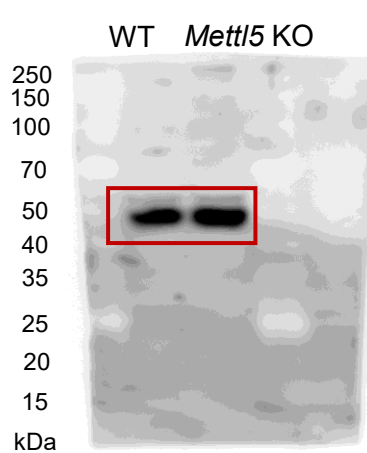

# Full unedited gel for Figure 6E.

## SOD1 ~16kDa

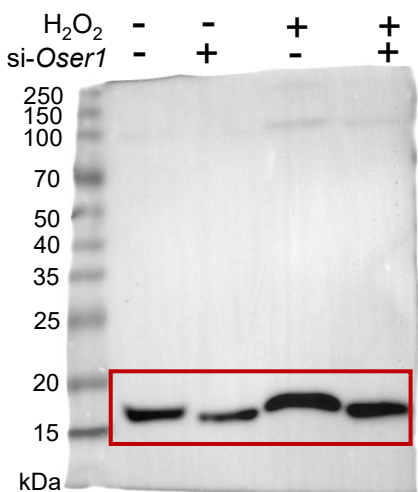

## CAT 60kDa

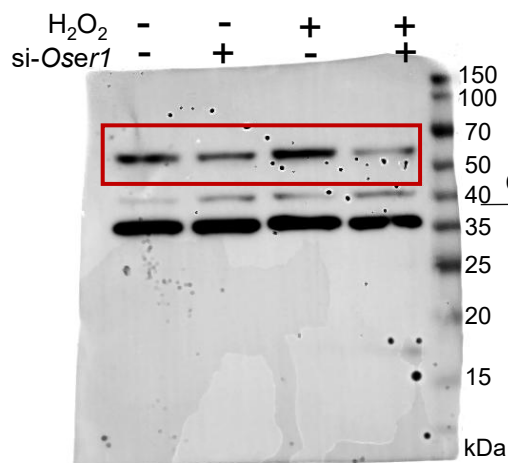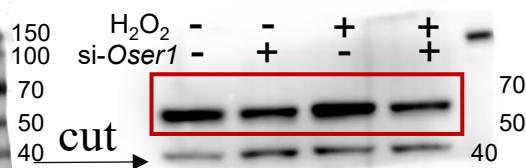

## α-TUBULIN 55kDa

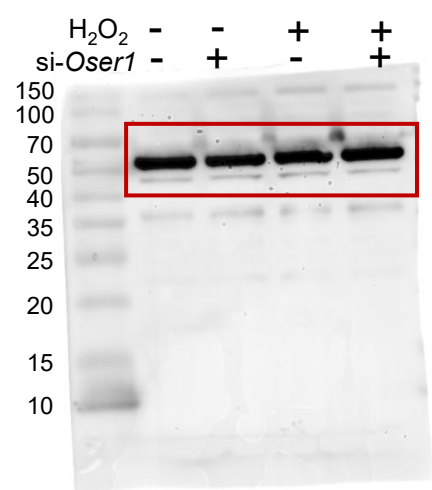

# Full unedited gel for Supplemental Figure 4.

**PUROMYCIN ~15-250kDa**

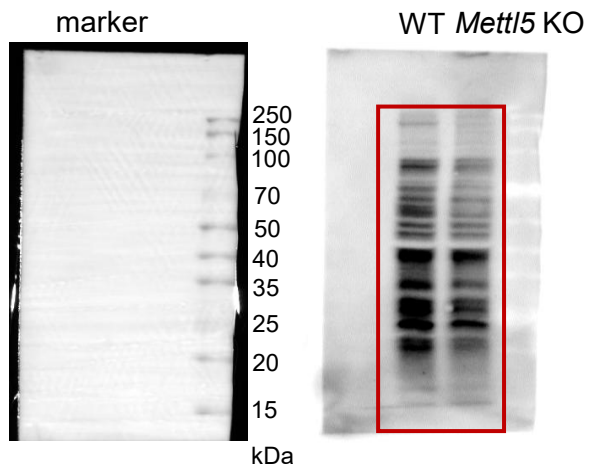

**$\alpha$ -TUBULIN 55kd**

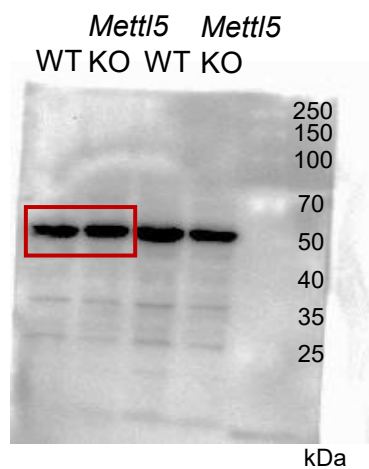

# Full unedited gel for Supplemental Figure 5A.

**OSER1 32kd**

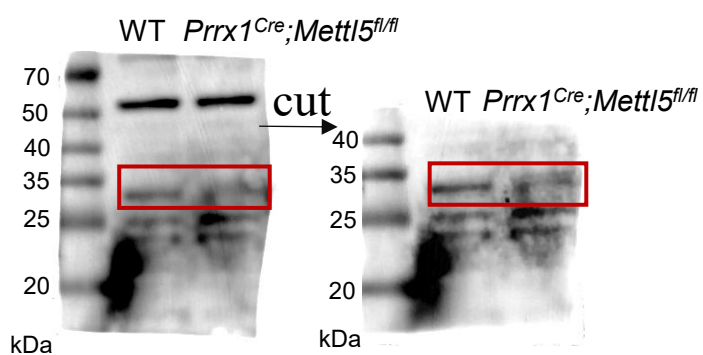

**$\alpha$ -TUBULIN 55kd**

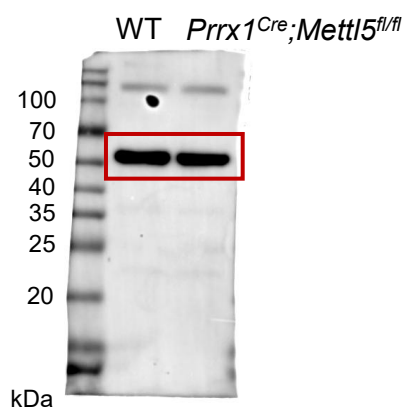

# Full unedited gel for Supplemental Figure 5B.

## OSER1 32kd

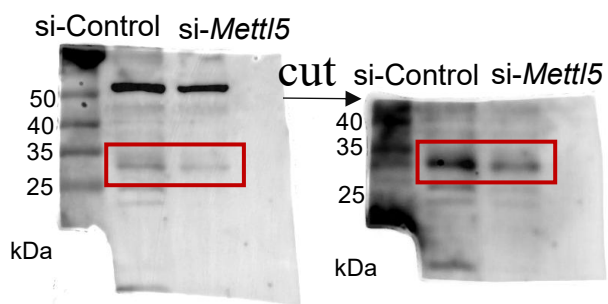

## $\alpha$ -TUBULIN 55kd

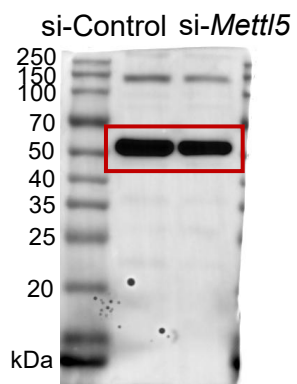

Supplement: sd2 [file 2]
